# Supplementary material for: Reduction of Sulphur Dose in the Control of Powdery Mildew of Grapevine through Silicate and Equisetum arvense Foliar Applications and Effect on Yield and Berry Quality
Source: Preprints.org preprint supplement (doi:10.20944/preprints202402.0164.v1), 2024-02-02
Supplement: Supplementary file 4 [file supplementary]

## Sheet: Table S1
			Table S1. Rainfall and temperature in the 2022 growing season at Ari vineyard
			until the end of the period at high risk of powdery mildew infections.
			Date	Maximum	Minimum	Rainfall
				Temperature (°C)	Temperature (°C)	(mm/day)
			2022-04-01	16.1	9.8	13.6
			2022-04-02	12.2	3.5	/
			2022-04-03	10.0	2.1	/
			2022-04-04	11.2	2.0	/
			2022-04-05	16.2	0.1	/
			2022-04-06	16.2	2.0	1.1
			2022-04-07	19.0	8.4	1.0
			2022-04-08	24.8	13.0	/
			2022-04-09	21.5	13.4	/
			2022-04-10	11.2	4.4	7.0
			2022-04-11	16.2	0.2	/
			2022-04-12	18.0	3.4	/
			2022-04-13	18.0	5.3	/
			2022-04-14	18.8	3.9	/
			2022-04-15	18.7	5.5	/
			2022-04-16	19.5	5.1	/
			2022-04-17	13.4	8.3	/
			2022-04-18	14.0	5.7	/
			2022-04-19	18.7	0.7	/
			2022-04-20	15.1	6.6	/
			2022-04-21	13.0	8.9	9.3
			2022-04-22	19.8	10.4	2.6
			2022-04-23	22.2	7.1	/
			2022-04-24	21.9	10.5	2.4
			2022-04-25	19.9	9.7	/
			2022-04-26	20.5	7.4	/
			2022-04-27	20.1	6.4	/
			2022-04-28	17.6	7.1	/
			2022-04-29	19.9	9.9	/
			2022-04-30	10.2	8.1	/
			2022-05-01	19.2	7.4	/
			2022-05-02	18.4	8.4	4.4
			2022-05-03	18.9	5.8	/
			2022-05-04	20.8	8.2	/
			2022-05-05	18.2	9.4	/
			2022-05-06	15.0	11.9	2.9
			2022-05-07	14.0	11.2	8.2
			2022-05-08	16.2	11.5	5.1
			2022-05-09	20.3	9.8	/
			2022-05-10	23.3	8.7	/
			2022-05-11	27.1	9.4	/
			2022-05-12	27.3	11.9	/
			2022-05-13	26.5	11.6	/
			2022-05-14	25.6	12.5	/
			2022-05-15	26.4	12.9	/
			2022-05-16	27.9	14.5	/
			2022-05-17	27.3	13.9	/
			2022-05-18	24.2	12.7	/
			2022-05-19	24.0	11.0	/
			2022-05-20	28.4	9.2	/
			2022-05-21	28.9	14.3	/
			2022-05-22	29.1	14.8	/
			2022-05-23	28.6	15.7	/
			2022-05-24	32.8	16.2	/
			2022-05-25	28.9	16.3	/
			2022-05-26	27.4	15.0	/
			2022-05-27	26.7	17.6	3.3
			2022-05-28	29.3	16.4	/
			2022-05-29	22.9	16.6	2.3
			2022-05-30	25.9	12.7	/
			2022-05-31	26.3	14.8	/
			2022-06-01	27.9	13.7	/
			2022-06-02	31.3	16.4	/
			2022-06-03	32.6	16.8	/
			2022-06-04	31.7	18.1	1.4
			2022-06-05	33.6	18.4	1.2
			2022-06-06	34.5	19.1	/
			2022-06-07	32.4	16.4	/
			2022-06-08	26.2	15.4	/
			2022-06-09	19.6	15.2	17.1
			2022-06-10	20.5	15.1	12.9
			2022-06-11	25.8	17.3	/
			2022-06-12	26.9	17.7	/
			2022-06-13	29.9	16.1	/
			2022-06-14	29.1	16.0	/
			2022-06-15	29.8	15.8	/
			2022-06-16	30.0	18.0	/
			2022-06-17	29.4	19.0	/
			2022-06-18	27.3	15.6	/
			2022-06-19	28.4	14.3	/
			2022-06-20	32.3	15.5	/
			2022-06-21	32.9	18.2	/
			2022-06-22	32.3	19.8	/
			2022-06-23	31.3	21.1	/
			2022-06-24	33.5	20.9	/
			2022-06-25	29.1	19.4	/
			2022-06-26	31.0	17.8	/
			2022-06-27	34.2	18.7	/
			2022-06-28	35.5	21.8	/
			2022-06-29	29.9	20.3	/
			2022-06-30	31.4	18.9	/
			2022-07-01	34.1	18.7	2.0
			2022-07-02	30.8	19.1	/
			2022-07-03	31.8	20.0	/
			2022-07-04	33.4	19.6	/
			2022-07-05	32.5	20.3	/
			2022-07-06	29.8	19.6	/
			2022-07-07	30.0	17.6	13.2
			2022-07-08	23.3	17.7	7.2
			2022-07-09	24.6	18.4	1.0
			2022-07-10	26.2	16.3	/
			2022-07-11	27.2	13.8	/
			2022-07-12	26.8	16.4	2.5
			2022-07-13	26.9	14.9	3.0
			2022-07-14	30.3	14.0	/
			2022-07-15	34.9	16.9	/
			2022-07-16	33.4	21.5	/
			2022-07-17	32.0	20.5	/
			2022-07-18	29.8	18.7	/
			2022-07-19	30.0	16.1	/
			2022-07-20	31.8	15.3	/
			2022-07-21	33.6	18.1	/
			2022-07-22	34.1	19.7	/
			2022-07-23	35.9	21.2	/
			2022-07-24	33.3	20.8	/
			2022-07-25	34.2	21.2	/
			2022-07-26	34.4	22.8	3.1
			2022-07-27	31.4	19.8	11.2
			2022-07-28	29.7	18.8	/
			2022-07-29	29.8	20.8	12.9
			2022-07-30	28.8	22.0	3.6
			2022-07-31	29.3	18.3	/

## Sheet: Table S2
			Table S2. Rainfall and temperature in the 2023 growing season at Cellino vineyard
			until the end of the period at high risk of powdery mildew infections.
			Date	Maximum	Minimum	Rainfall
				Temperature (°C)	Temperature (°C)	(mm -1/day)
			2023-04-01	16.0	8.7	/
			2023-04-02	12.8	6.9	/
			2023-04-03	8.3	5.2	3.2
			2023-04-04	5.2	3.4	2.9
			2023-04-05	5.3	2.2	1.1
			2023-04-06	10.6	1.2	/
			2023-04-07	14.8	5.3	/
			2023-04-08	12.1	5.0	5.0
			2023-04-09	11.2	5.5	5.1
			2023-04-10	10.3	2.5	/
			2023-04-11	16.6	4.9	/
			2023-04-12	17.5	10.0	/
			2023-04-13	19.2	7.8	4.7
			2023-04-14	12.4	5.9	1.1
			2023-04-15	12.9	6.3	5.8
			2023-04-16	9.0	7.4	21.1
			2023-04-17	10.8	7.8	5.1
			2023-04-18	11.3	8.5	4.3
			2023-04-19	16.1	8.0	4.8
			2023-04-20	17.5	7.4	/
			2023-04-21	16.7	6.5	6.5
			2023-04-22	17.6	6.7	/
			2023-04-23	21.4	13.4	/
			2023-04-24	19.3	10.3	3.6
			2023-04-25	14.1	8.5	3.0
			2023-04-26	16.5	8.6	/
			2023-04-27	16.7	6.9	/
			2023-04-28	20.9	9.6	/
			2023-04-29	21.0	13.8	1.9
			2023-04-30	18.7	10.5	14.6
			2023-05-01	14.9	8.8	24.9
			2023-05-02	17.5	10.3	16.7
			2023-05-03	16.2	12.4	10.9
			2023-05-04	18.5	12.3	/
			2023-05-05	20.5	11.5	/
			2023-05-06	22.5	14.6	/
			2023-05-07	23.9	17.4	/
			2023-05-08	20.2	14.0	2.3
			2023-05-09	19.7	13.3	/
			2023-05-10	16.6	12.1	9.3
			2023-05-11	17.5	11.9	11.9
			2023-05-12	18.4	8.7	/
			2023-05-13	16.7	8.5	4.4
			2023-05-14	15.8	10.4	5.8
			2023-05-15	13.5	9.1	3.5
			2023-05-16	16.1	10.8	15.3
			2023-05-17	15.7	12.3	43.1
			2023-05-18	17.1	11.1	10.9
			2023-05-19	18.6	10.5	2.4
			2023-05-20	17.9	12.1	7.6
			2023-05-21	20.3	12.4	1.5
			2023-05-22	23.0	13.3	/
			2023-05-23	24.1	12.5	/
			2023-05-24	23.2	16.2	/
			2023-05-25	23.3	13.2	/
			2023-05-26	24.0	13.7	/
			2023-05-27	22.1	16.0	/
			2023-05-28	22.5	15.4	/
			2023-05-29	23.0	13.1	/
			2023-05-30	22.3	14.4	/
			2023-05-31	21.8	13.3	10.0
			2023-06-01	23.1	13.0	/
			2023-06-02	24.0	13.7	/
			2023-06-03	24.3	14.5	/
			2023-06-04	23.3	13.7	2.3
			2023-06-05	21.5	15.6	7.9
			2023-06-06	21.9	13.3	7.3
			2023-06-07	22.8	13.8	2.8
			2023-06-08	23.3	16.4	7.4
			2023-06-09	23.9	17.2	/
			2023-06-10	21.0	16.8	15.2
			2023-06-11	23.0	16.3	20.7
			2023-06-12	23.0	15.3	14.0
			2023-06-13	23.0	15.3	7.5
			2023-06-14	23.5	15.9	19.9
			2023-06-15	18.5	13.5	19.9
			2023-06-16	23.0	15.2	/
			2023-06-17	25.0	15.5	/
			2023-06-18	26.6	17.0	/
			2023-06-19	27.6	20.6	/
			2023-06-20	29.4	19.5	/
			2023-06-21	30.6	19.1	/
			2023-06-22	33.8	20.3	/
			2023-06-23	28.9	21.7	/
			2023-06-24	23.4	21.0	5.4
			2023-06-25	25.8	17.6	/
			2023-06-26	28.6	16.0	/
			2023-06-27	30.8	18.4	/
			2023-06-28	27.1	17.3	/
			2023-06-29	25.9	17.7	/
			2023-06-30	28.7	17.0	/
			2023-07-01	24.0	17.3	5.8
			2023-07-02	25.8	17.9	/
			2023-07-03	28.8	18.6	/
			2023-07-04	27.3	20.1	2.9
			2023-07-05	26.9	20.1	/
			2023-07-06	29.1	21.1	/
			2023-07-07	25.7	20.1	/
			2023-07-08	27.5	18.1	/
			2023-07-09	30.6	21.6	/
			2023-07-10	34.0	20.0	/
			2023-07-11	34.9	24.2	/
			2023-07-12	36.5	25.2	/
			2023-07-13	38.2	21.7	/
			2023-07-14	30.8	21.8	/
			2023-07-15	32.6	24.2	/
			2023-07-16	35.7	22.0	/
			2023-07-17	36.0	24.2	/
			2023-07-18	35.0	26.7	/
			2023-07-19	38.0	21.7	/
			2023-07-20	36.0	23.7	/
			2023-07-21	35.0	22.9	2.1
			2023-07-22	34.6	22.4	/
			2023-07-23	33.0	23.3	/
			2023-07-24	39.3	26.3	/
			2023-07-25	38.7	25.2	/
			2023-07-26	28.2	16.9	1.9
			2023-07-27	26.7	16.7	/
			2023-07-28	29.7	19.0	/
			2023-07-29	29.7	18.8	/
			2023-07-30	34.0	20.1	/
			2023-07-31	30.6	21.7	/
